# Supplementary material for: Supplementation of the Plant Conditioner ELICE Vakcina® Product with β-Aminobutyric Acid and Salicylic Acid May Lead to Trans-Priming Signaling in Barley (Hordeum vulgare)
Source: MDPI journal article supplement (doi:10.3390/plants12122308), 2023-06-14
Supplement: s1 [file s1]

TableS1  
Functional description of Top50DEGs

| <i>Gene product</i>                           | <i>Abbreviation</i>        | <i>Function</i>                                                                                                                                                                                                                                                                                                                                                                                                                                |
|-----------------------------------------------|----------------------------|------------------------------------------------------------------------------------------------------------------------------------------------------------------------------------------------------------------------------------------------------------------------------------------------------------------------------------------------------------------------------------------------------------------------------------------------|
| <b>Photosynthesis</b>                         |                            |                                                                                                                                                                                                                                                                                                                                                                                                                                                |
| <i>Far-red impaired response1</i>             | FAR1                       | Required for chlorophyll biosynthesis ( <a href="#">Ma and Li, 2018</a> )<br>Enhances the expression of defense-responsive genes ( <a href="#">Tang et al., 2012</a> )<br>Binds to the ABI5 promoter and activate its transcription thus mediating ABA signal transduction and abiotic stress responses ( <a href="#">Skubacz et al., 2016</a> )                                                                                               |
| <i>NifU-like protein 2, chloroplastic</i>     | NIFU                       | Required for the assembly of photosystem I complex ( <a href="#">Leon et al., 2003</a> )                                                                                                                                                                                                                                                                                                                                                       |
| <b>Abiotic stress and biotic stress</b>       |                            |                                                                                                                                                                                                                                                                                                                                                                                                                                                |
| <b>JAZ proteins*</b>                          | TIFY9<br>TIFY10<br>TIFY11e | Are involved in JA and other hormone signaling pathways, including auxins, gibberellins (GAs), ABA, SA, and ethylene (ET) ( <a href="#">Turner et al, 2002</a> , <a href="#">Solano et al, 2003</a> )                                                                                                                                                                                                                                          |
| <i>Far-red impaired response1</i>             | FAR1                       | Required for chlorophyll biosynthesis ( <a href="#">Ma and Li, 2018</a> )<br>Enhances the expression of defense-responsive genes ( <a href="#">Tang et al., 2012</a> )<br>Binds to the ABI5 promoter and activate its transcription thus mediating ABA signal transduction and abiotic stress responses ( <a href="#">Wang et al., 2016</a> )                                                                                                  |
| <i>Blue-copper binding proteins</i>           | BlueCu_1_BS                | Regulate cotton immune response through lignin synthesis and JA signaling pathway ( <a href="#">Zhu et al, 2018</a> )                                                                                                                                                                                                                                                                                                                          |
| <b>Phenylalanine ammonia lyase*</b>           | PAL                        | PAL gene expression responds to a variety of environmental stresses, including pathogen infection, wounding, nutrient depletion, UV irradiation, and extreme temperatures ( <a href="#">Huang et al., 2010</a> )<br>It is involved in the biosynthesis of SA, essential signal involved in plant systemic resistance ( <a href="#">Kim and Whang, 2014</a> )                                                                                   |
| <i>Bowmann-Birk type-proteinase inhibitor</i> | BB1<br>PR6                 | Play a role in plant defense against insects and pathogens ( <a href="#">Xie et al., 2021</a> )<br>BBI-expressing plants exhibit better performance under drought stress due to the observed reduced increase in antioxidant enzymes activity (GST) and reduced MDA content. ( <a href="#">Malefo et al., 2020</a> )                                                                                                                           |
| <i>Endo-1,3(4)-beta-glucanase 2</i>           | PR2                        | A hydrolyzing enzymes that indirectly and directly participate in the plant defense response against various pathogenic fungi, bacteria and viruses like tomato yellow leaf curl virus (TYLCV) ( <a href="#">Mestre et al. 2017</a> ; <a href="#">Wang et al.2020</a> ; <a href="#">Hata et al. 2021</a> ).                                                                                                                                    |
| <b>Allene-oxide synthase*</b>                 | AOS                        | It has a key role in the synthesis of JA and biologically active jasmonoyl-isoleucine (JA-Ile) ( <a href="#">Turner et al., 2022</a> ).<br>It play important roles in the mediation of plant responses and defenses to various biotic (pathogen, insect, and herbivore ) and abiotic (drought, cold, salt, heat, and heavy metal toxicity) stresses therefore have received extensive research attention ( <a href="#">Wang et al., 2021</a> ) |

|                                               |       |                                                                                                                                                                                                                                                                                                                                                                                                                                                                                                                          |
|-----------------------------------------------|-------|--------------------------------------------------------------------------------------------------------------------------------------------------------------------------------------------------------------------------------------------------------------------------------------------------------------------------------------------------------------------------------------------------------------------------------------------------------------------------------------------------------------------------|
| <i>Chemocyanin-like protein</i>               | CLP1  | It plays positive roles in wheat response to high-salinity, heavy cupric stress and stripe rust ( <a href="#">Feng et al., 2013</a> )                                                                                                                                                                                                                                                                                                                                                                                    |
| <b>Biotic stress</b>                          |       |                                                                                                                                                                                                                                                                                                                                                                                                                                                                                                                          |
| <i>Papain-like cistein proteases</i>          | PLCPs | Are required for full resistance of plants to various pathogens ( <a href="#">Linde et al, 2012</a> )<br>Are targeted by secreted pathogen effectors to suppress immune responses ( <a href="#">Ilyas et al, 2015</a> )<br>Are subject to a co-evolutionary host–pathogen arms race ( <a href="#">Kashani and Horn 2010</a> ).<br>Induce a broad spectrum of defense responses including plant cell death.<br>( <a href="#">Willamil et al., 2016</a> )                                                                  |
| <i>Thionins</i>                               | BTH7  | Are plant-specific antimicrobial peptides isolated from numerous plant species ( <a href="#">Plattner et al., 2015</a> )                                                                                                                                                                                                                                                                                                                                                                                                 |
| <i>Catalase2</i>                              | Cat-2 | Serves to protect cells from the toxic effects of hydrogen peroxide ( <a href="#">Song et al., 2021</a> )<br>It is involved in response to biotic stimulus ( <a href="#">Zhang et al., 2021</a> )<br>CAT2 expression also plays an important role in plant immunity( <a href="#">Baker et al., 2023</a> ).<br>It promotes JA biosynthesis by facilitating direct interaction of the JA biosynthetic enzymes ACX2 and ACX3, and thus SA repression of CAT2 inhibits JA accumulation ( <a href="#">Yuan et al., 2017</a> ) |
| <b>Abiotic stress</b>                         |       |                                                                                                                                                                                                                                                                                                                                                                                                                                                                                                                          |
| <i>Aldehyde dehydrogenase family protein</i>  | ALDH  | plant responses to pathogens are limited, but a few recent report on plant ALDHs involved in the plant defense response against pests, pathogens, but mainly in osmotic stress, drought stress ( <a href="#">Tola et al., 2021</a> )                                                                                                                                                                                                                                                                                     |
| <i>TF bHLH family</i>                         | bHLH6 | Involved in adaptive response to various abiotic stress ( <a href="#">Qua net al., 2021</a> )<br>Involved in free radical scavange and elimination of ROS accumulation ( <a href="#">Ji et al., 2016</a> )<br>Participate in drought resistance, low temperature and salt resistance ( <a href="#">Lu et al., 2022</a> )<br>Involved in JA and ABA signaling ( <a href="#">Aleman et al., 2016</a> )                                                                                                                     |
| <i>Boiling stable protein</i>                 | SP    | It is a stress responsive protein associated with ABA pathway and water, desiccation, heat stress ( <a href="#">Sharma et al., 2019</a> , <a href="#">Rakhra et a., 2017</a> )                                                                                                                                                                                                                                                                                                                                           |
| <i>Calcium-binding protein</i>                | CML16 | It is involved to plant development and response to stresses such as abiotic, drought stress, plant immunity, oxidative stress ( <a href="#">Zeng et al., 2015</a> , <a href="#">Ranty, 2016.</a> , <a href="#">Zhu et al., 2017</a> , <a href="#">Magnan et al., 2018</a> , <a href="#">Delk et al., 2005</a> )                                                                                                                                                                                                         |
| <i>3-phosphoglycerate dehydrogenase</i>       | PGDH  | Presumably it is involved in abiotic stress, such as salt, drought, oxidative and low temperature, in higher plants, however its role is largely unexplored ( <a href="#">Wang et al., 2021</a> )                                                                                                                                                                                                                                                                                                                        |
| <i>UDP-glucuronic acid decarboxylase</i>      | UXS-4 | It is involved in cell wall polysaccharides ( <a href="#">Xu et al. 2023</a> ), xylan biosynthesis ( <a href="#">Ruan et al, 2022</a> ) and osmotic stress tolerance ( <a href="#">Shen et al., 2022</a> )                                                                                                                                                                                                                                                                                                               |
| <i>Amino-cyclopropane-carboxylate oxidase</i> | ACO   | It is involved in abiotic stress and its expression is associated to ETH concentration ( <a href="#">Napieraj et al., 2023</a> )                                                                                                                                                                                                                                                                                                                                                                                         |
| <i>Hydrophobic protein LTI6B</i>              | LTI6B | Plays a role in the regulation of membrane potential ( <a href="#">Morsy et al., 2005</a> )                                                                                                                                                                                                                                                                                                                                                                                                                              |

|  |  |                                                                                                               |
|--|--|---------------------------------------------------------------------------------------------------------------|
|  |  | Involved in response to ABA and response to cold and salt stress<br>( <a href="#">Razzaque et al., 2017</a> ) |
|--|--|---------------------------------------------------------------------------------------------------------------|
