# Supplementary figures and images for: Supplementation of the Plant Conditioner ELICE Vakcina® Product with β-Aminobutyric Acid and Salicylic Acid May Lead to Trans-Priming Signaling in Barley (Hordeum vulgare)
Source: MDPI journal article supplement (doi:10.3390/plants12122308), 2023-06-14

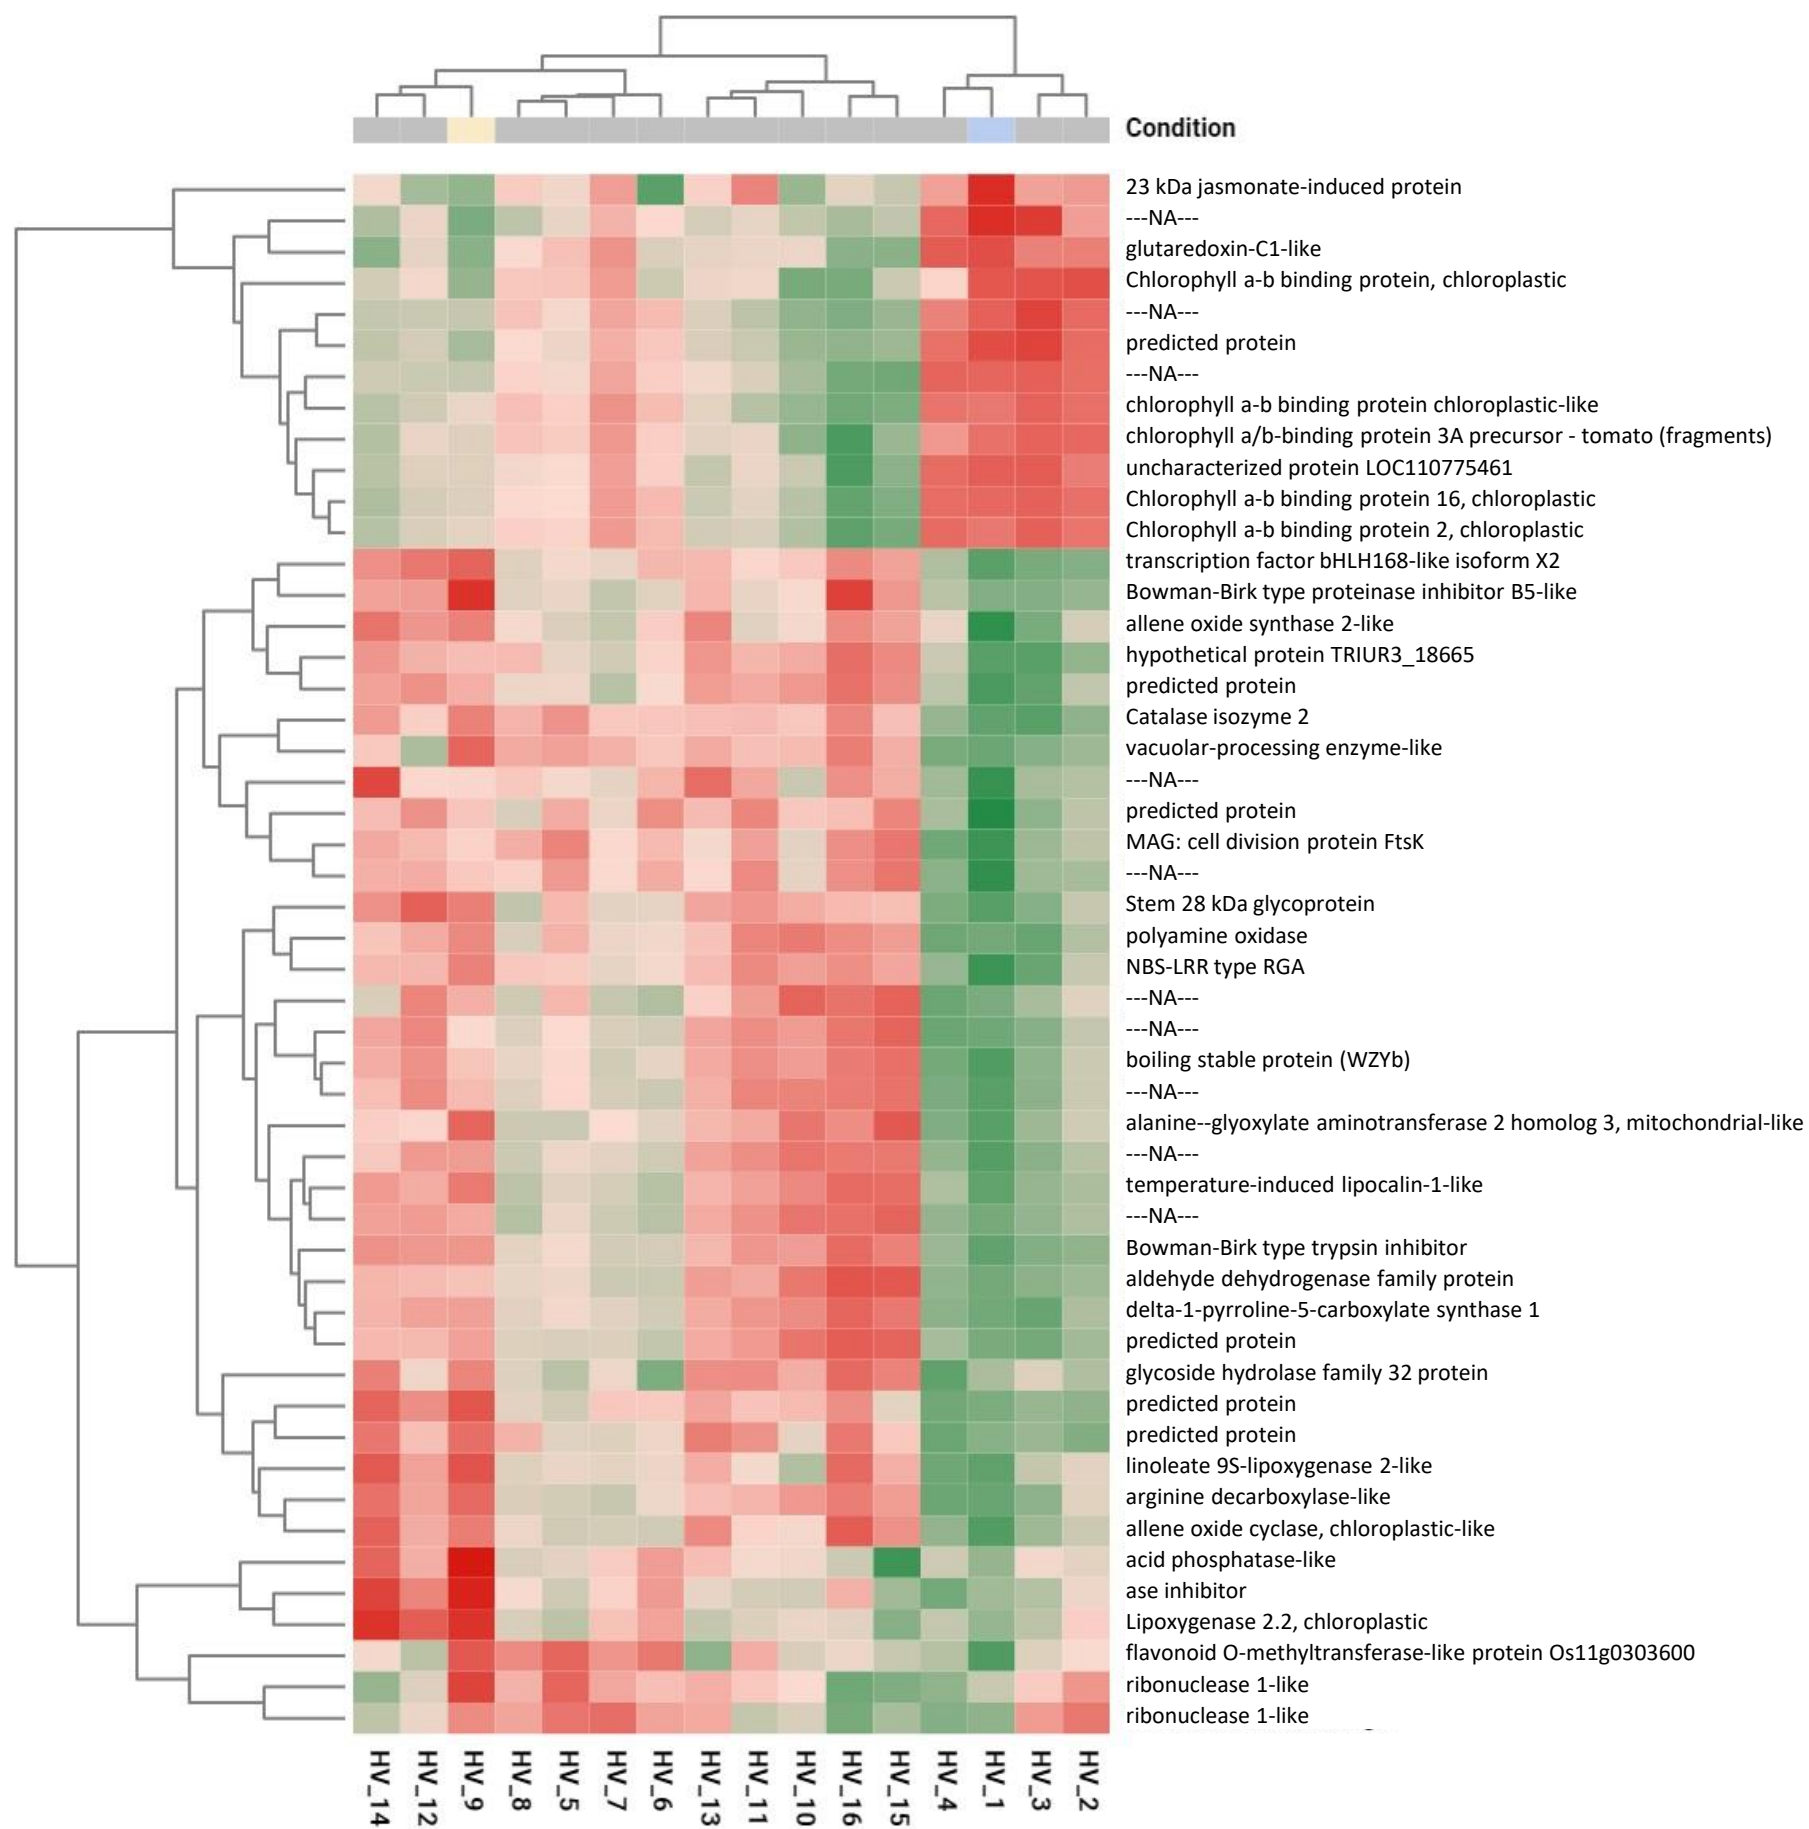

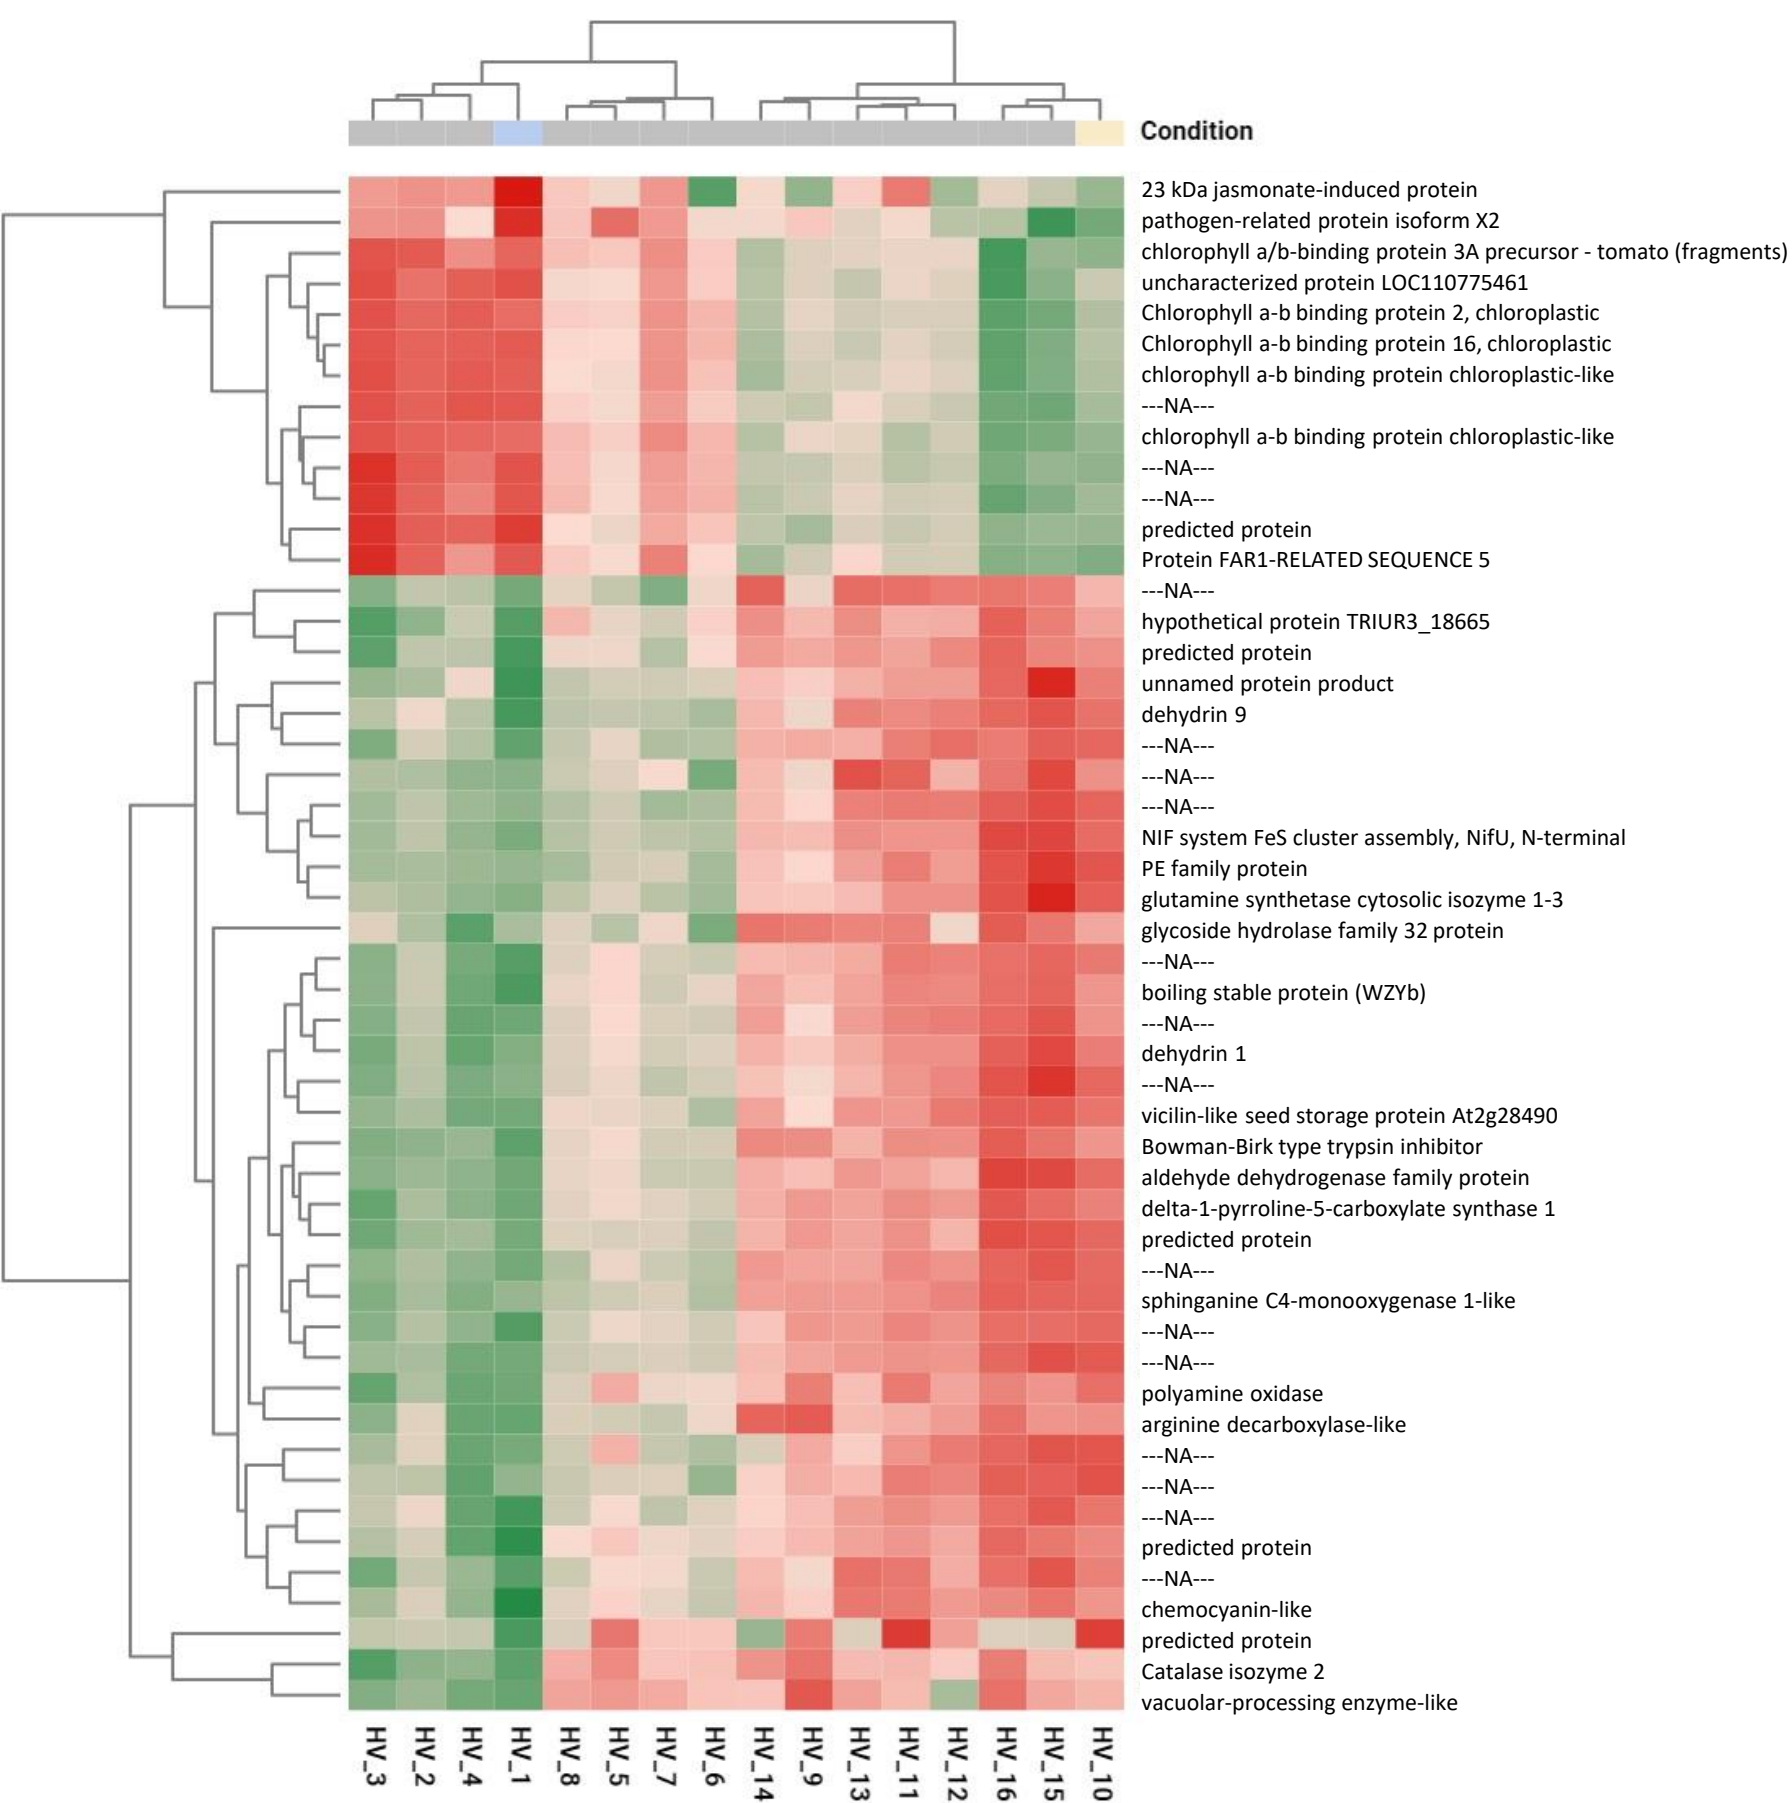

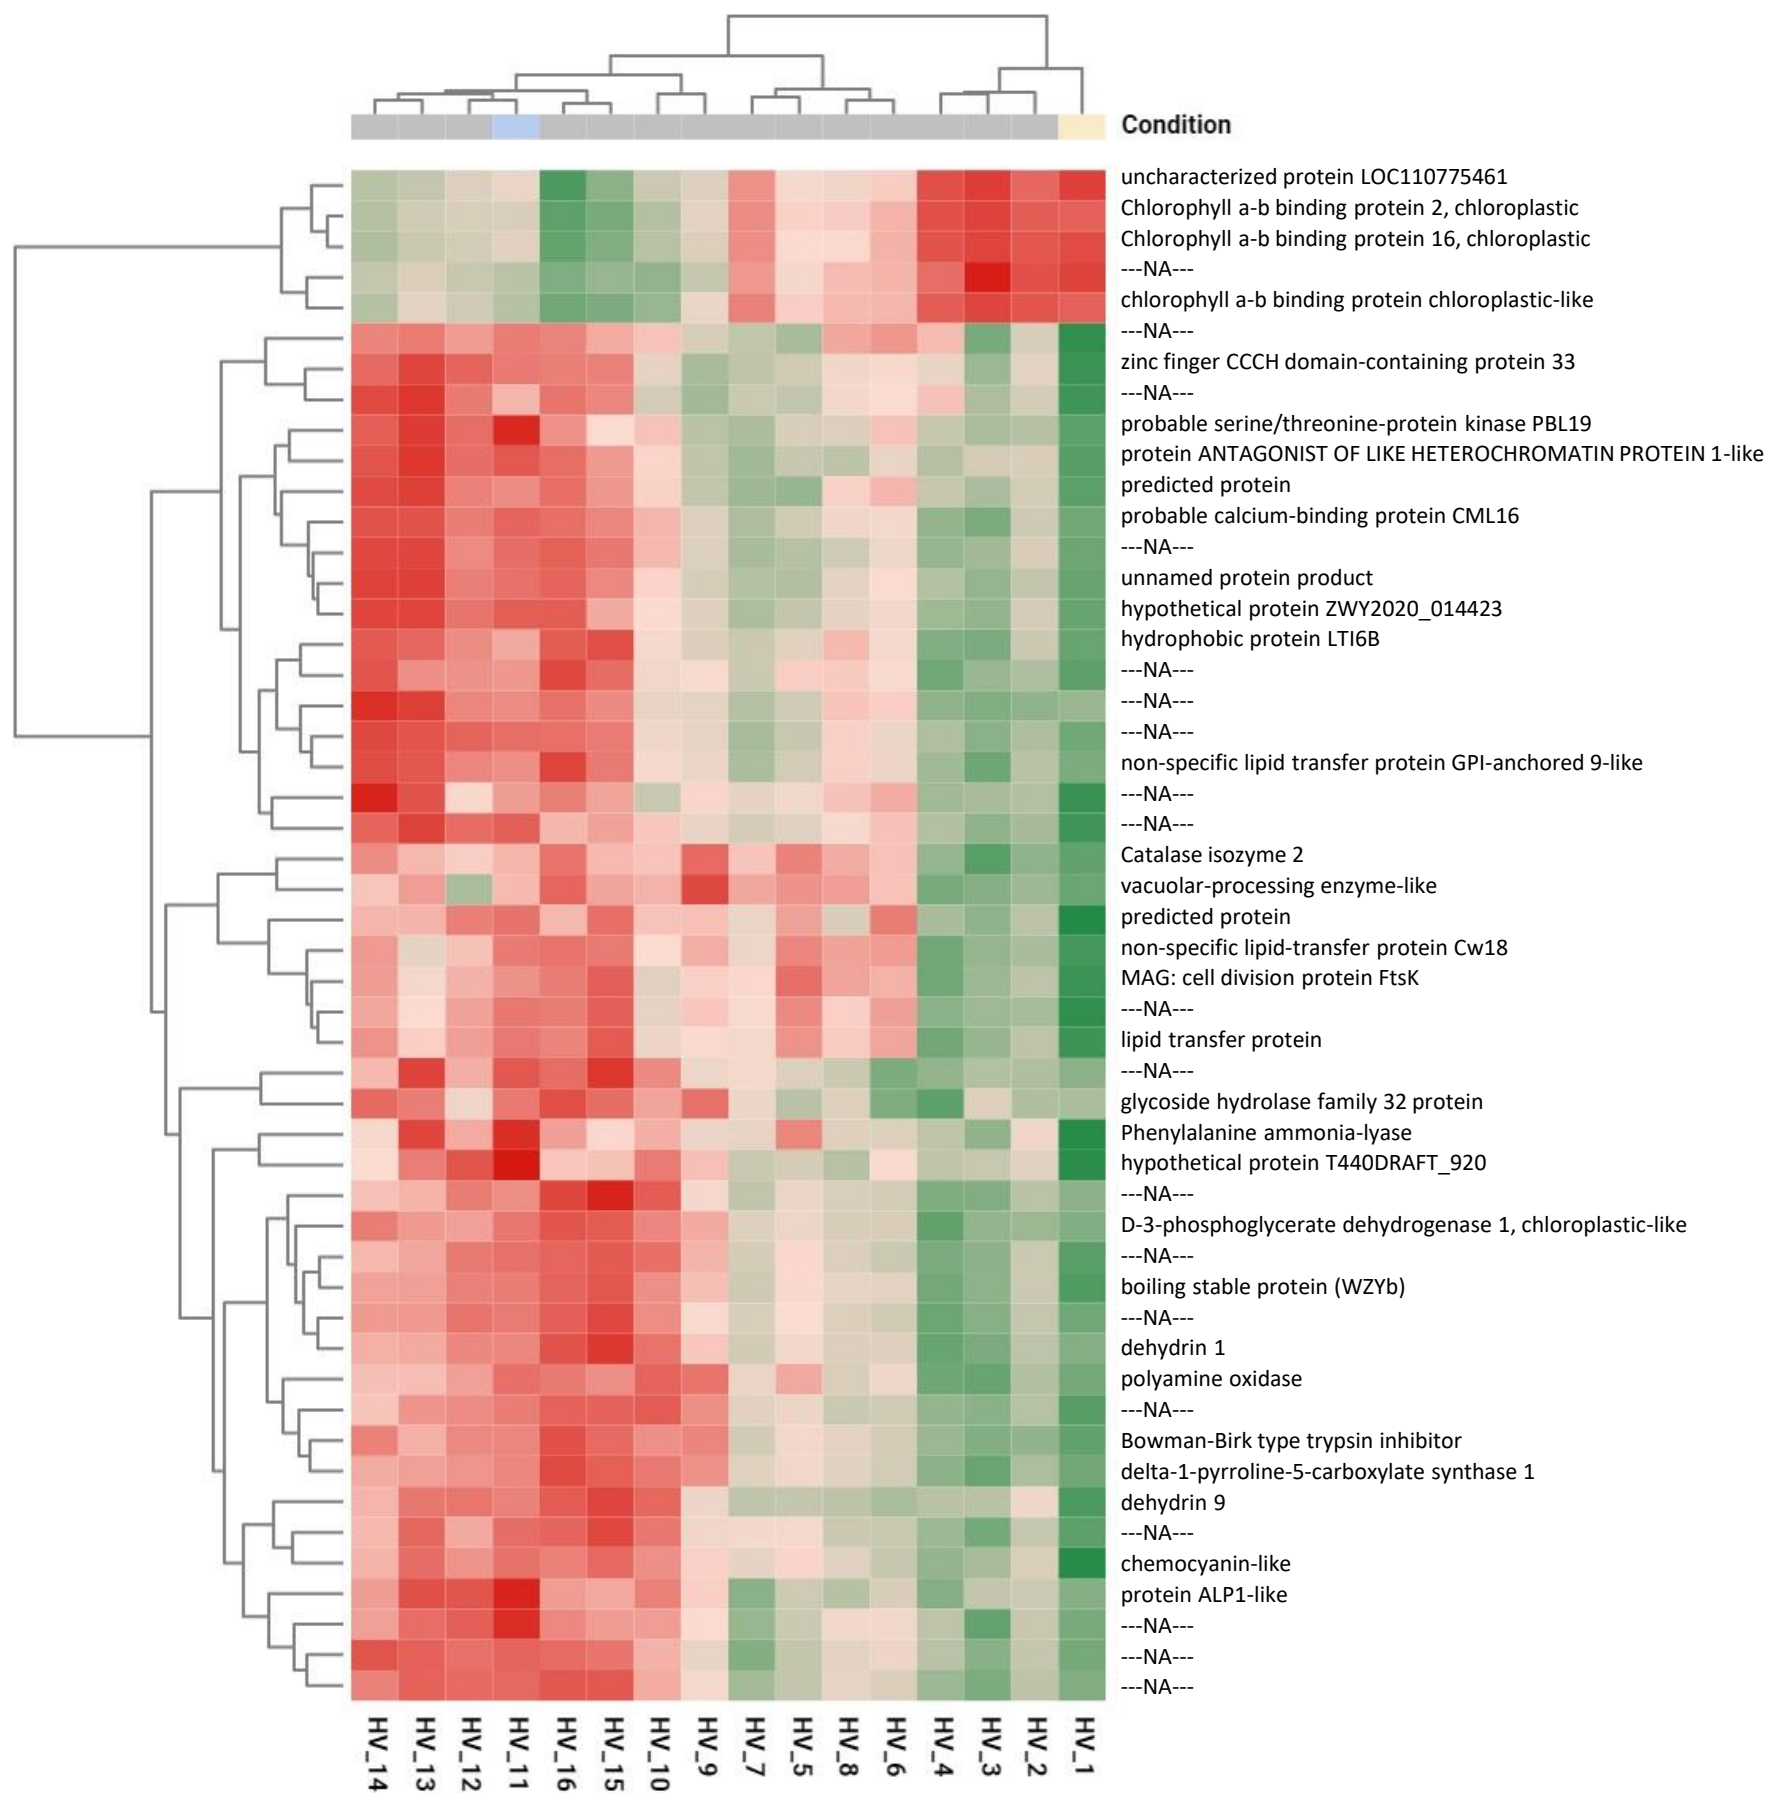

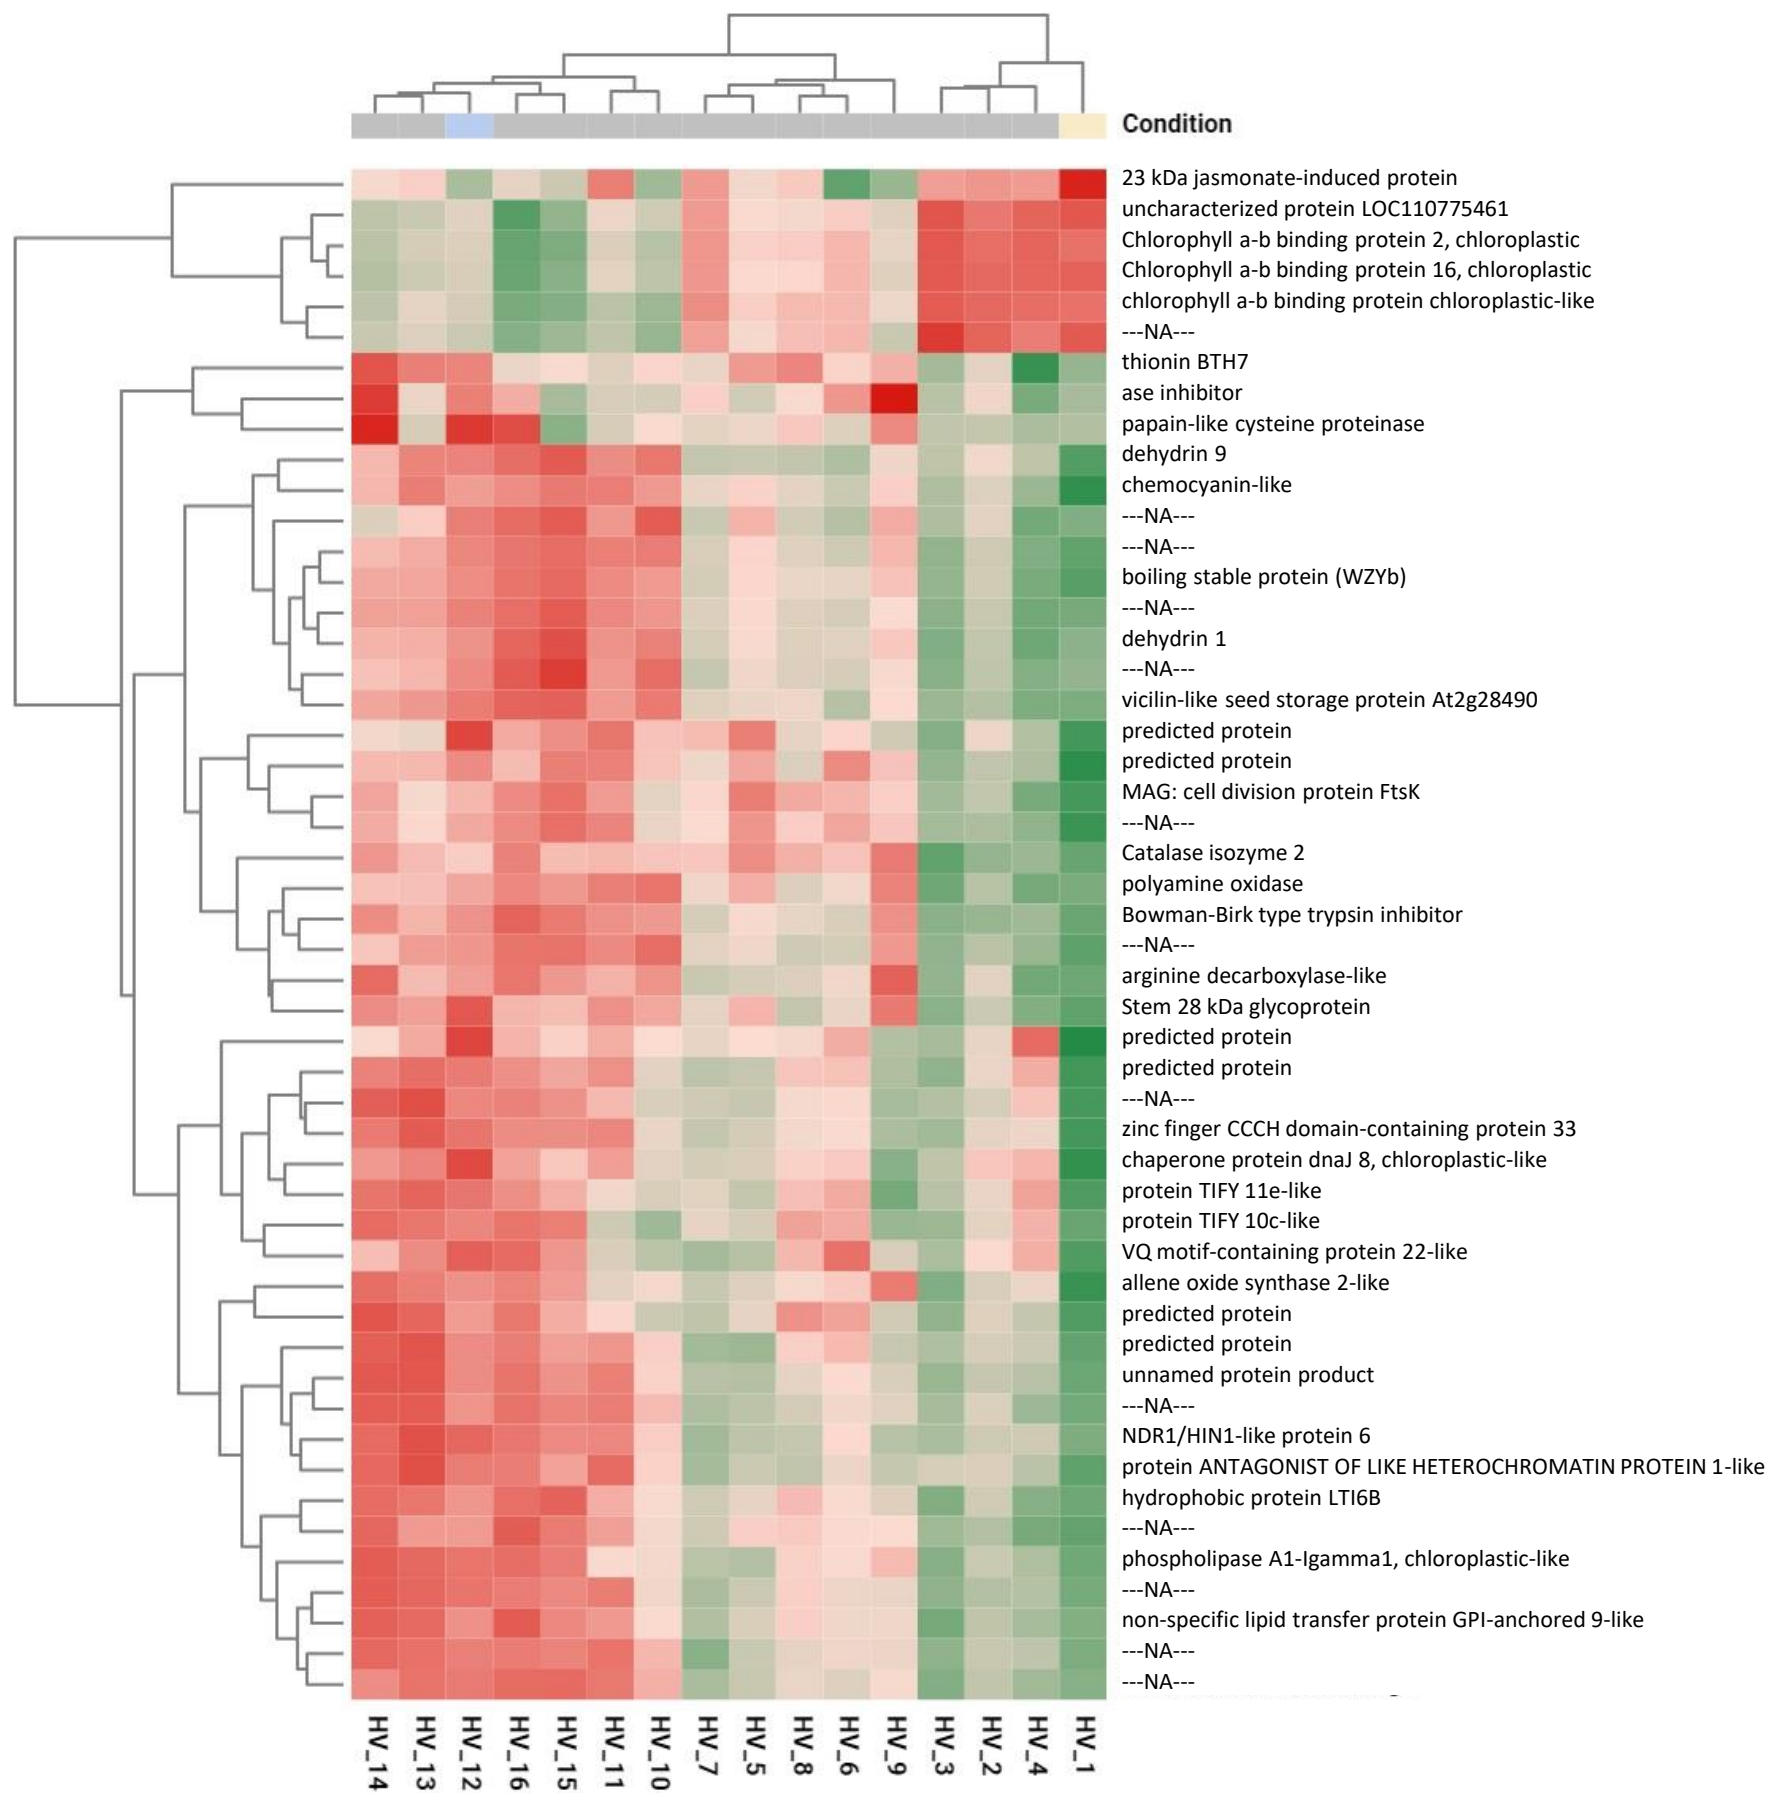



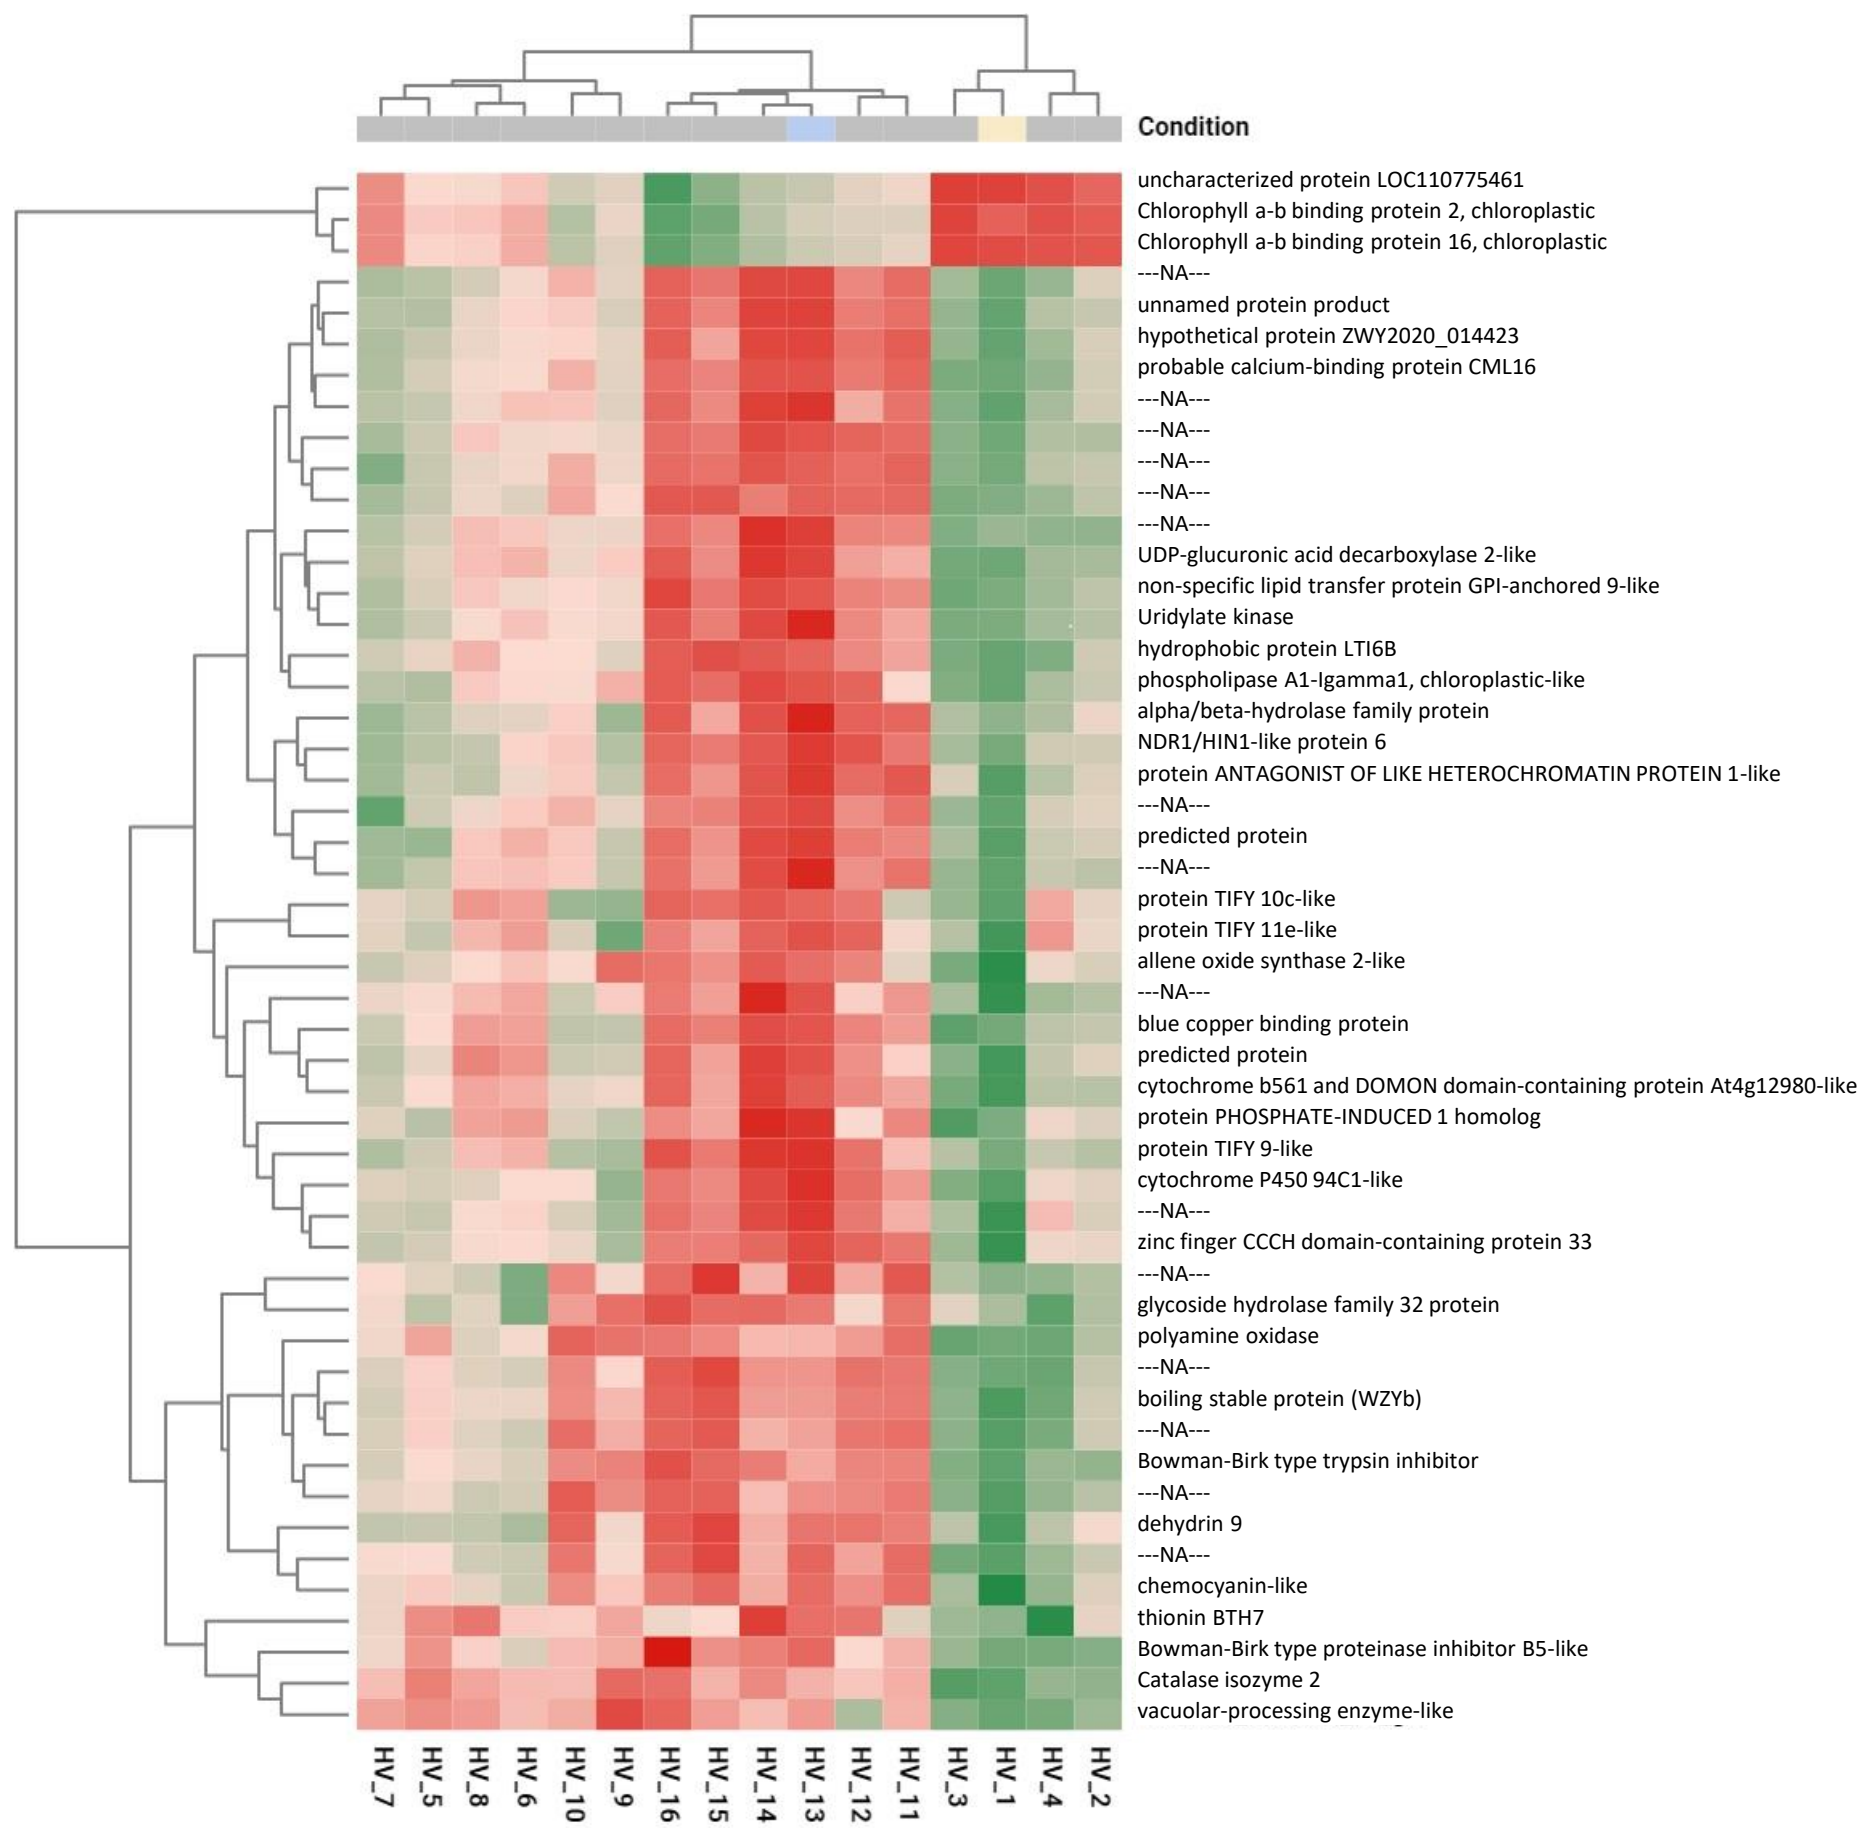

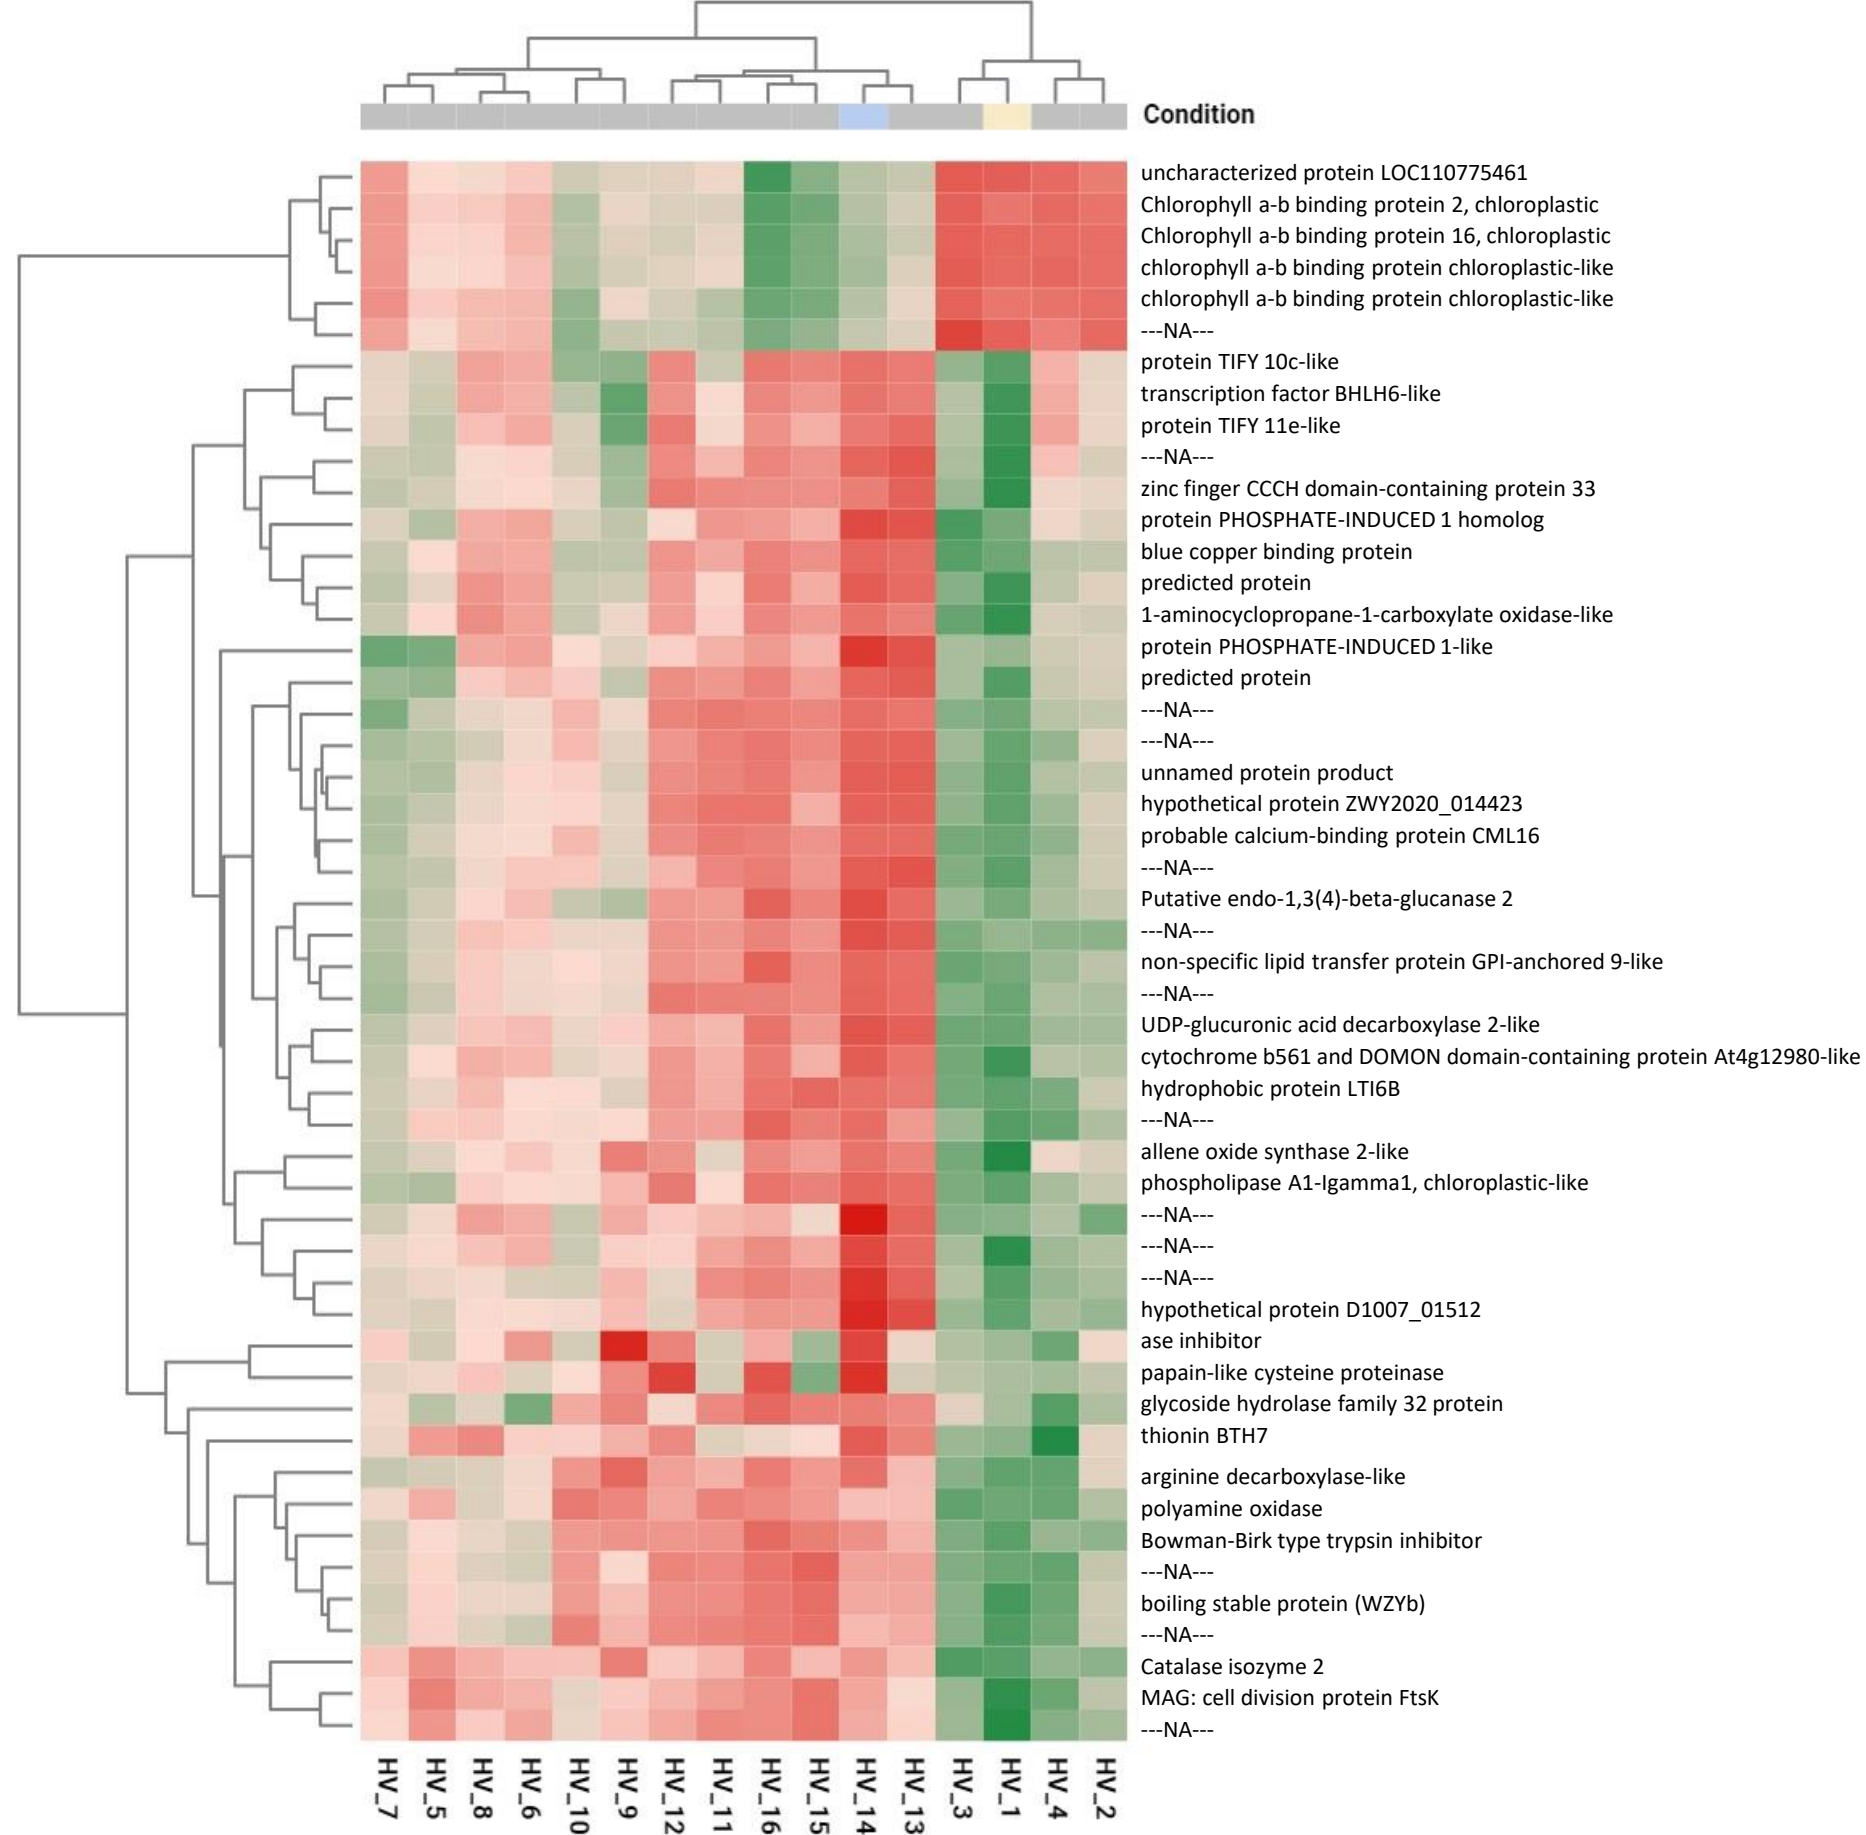

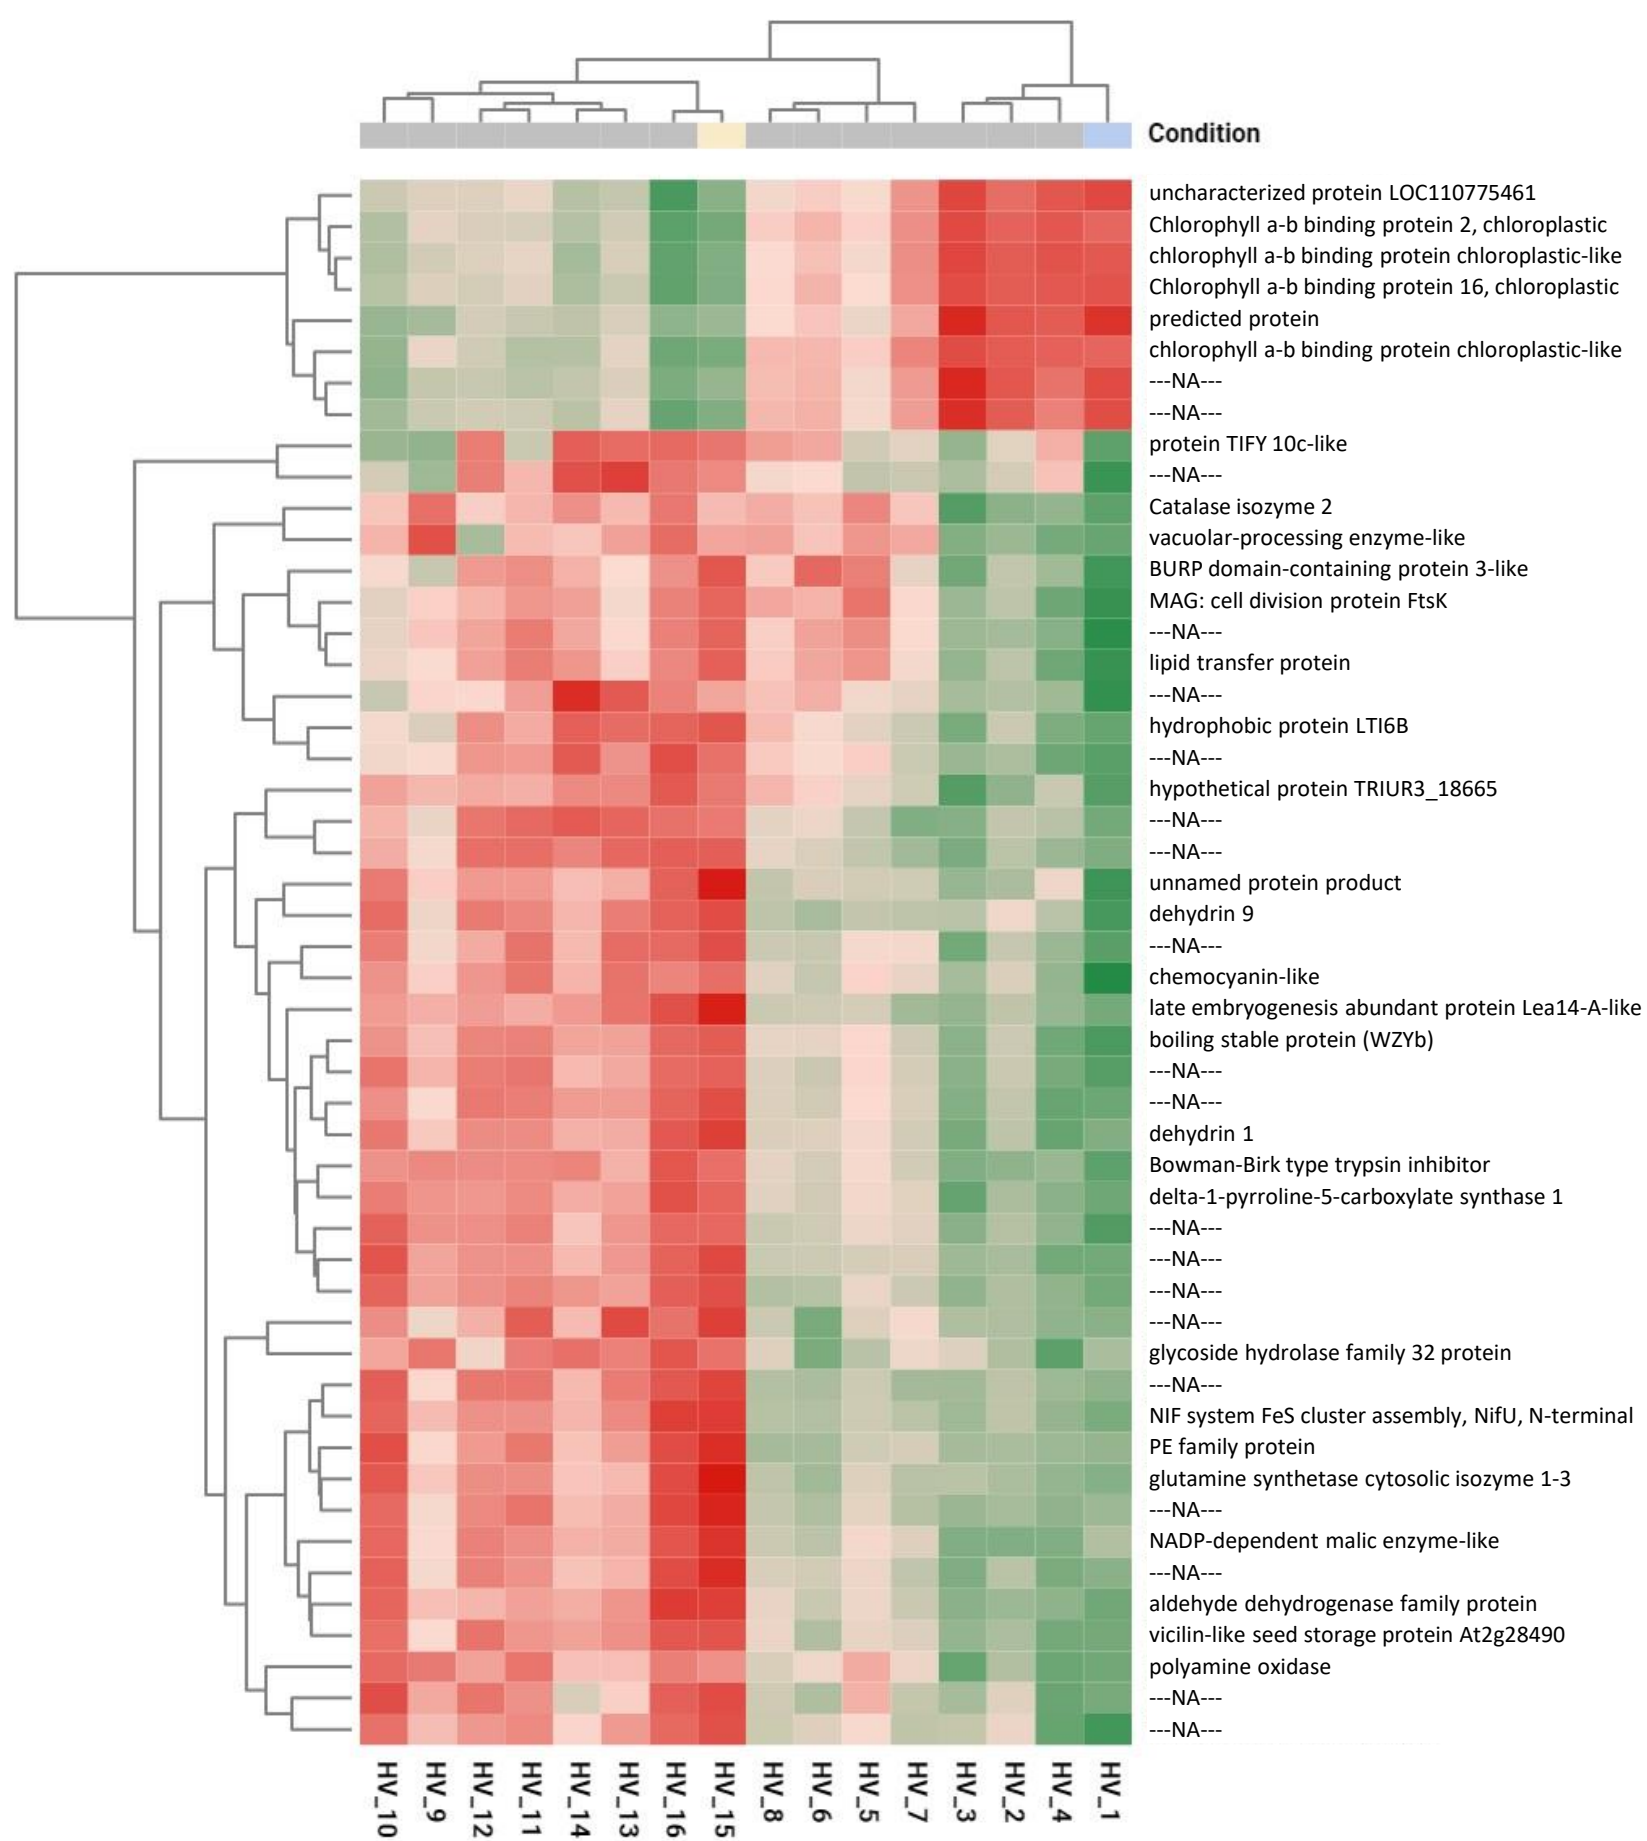

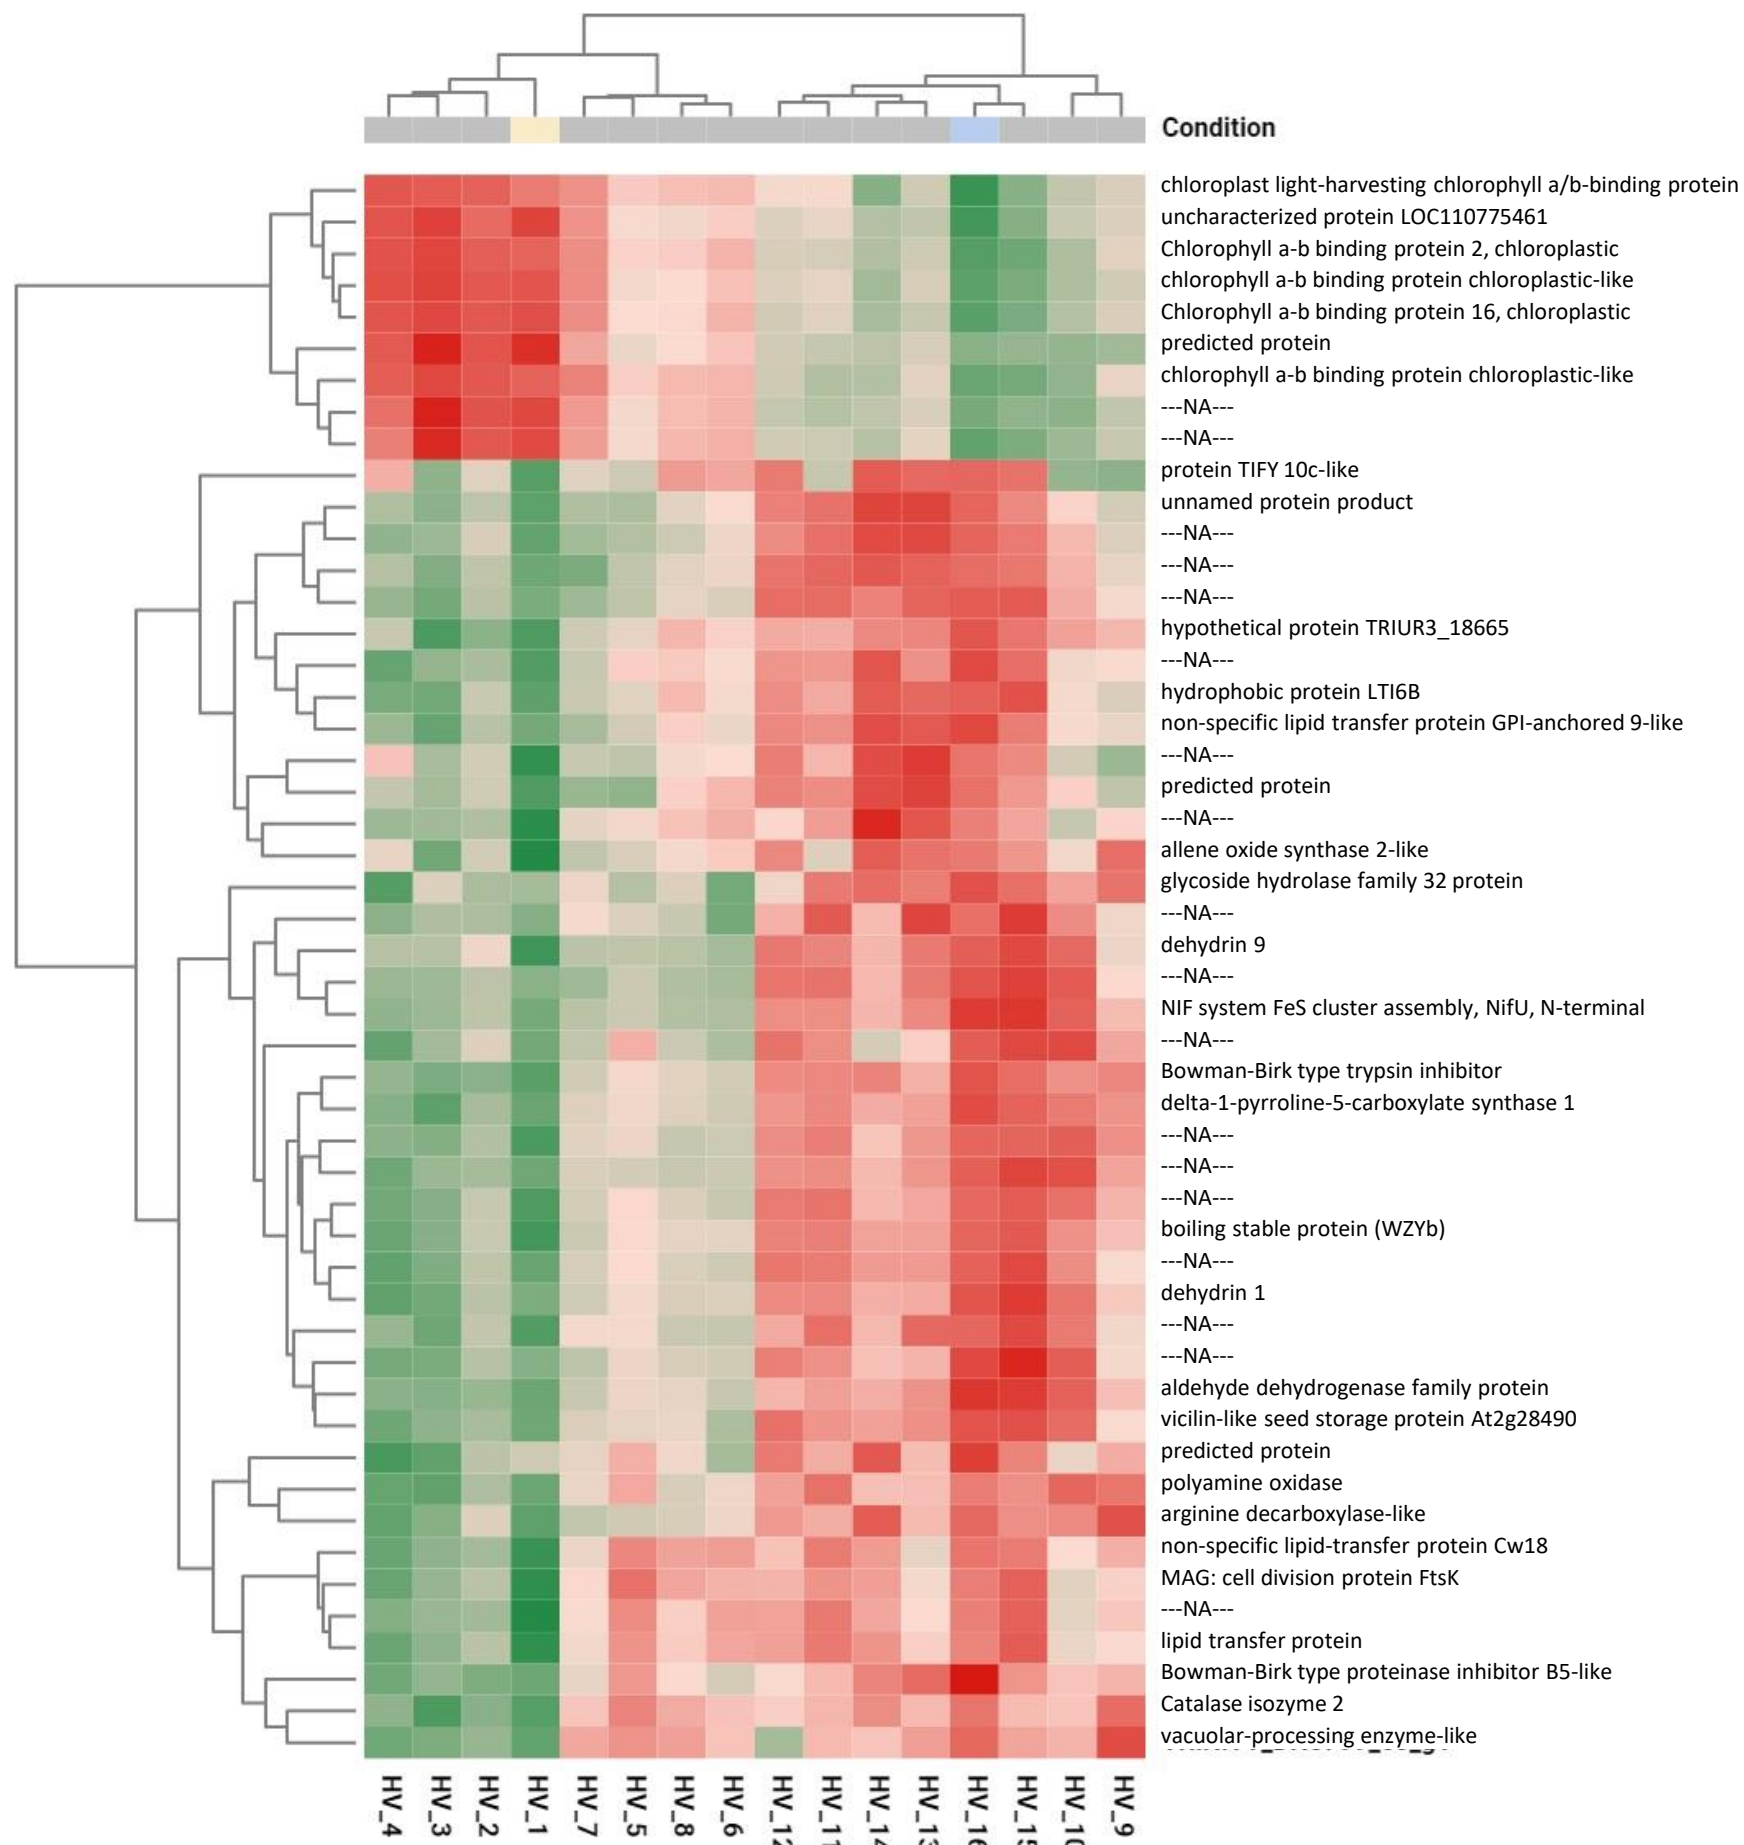

Supplement: s1 [file s1]
